# Supplementary material for: Prediction of Future Chronic Opioid Use Among Hospitalized Patients
Source: Springer Nature journal article supplement (doi:10.1007/s11606-018-4335-8), 2018-02-05
Supplement: MOESM2 [file 15442240]

**Appendix 2. Analgesic Medications Included in Study by Type**

| **Opioids** | **NSAIDS** | | |
| --- | --- | --- | --- |
| Acetaminophen-Codeine  Codeine  Oxycodone/Acetaminophen  Fentanyl  Hydrocodone/Acetaminophen  Hydromorphone  Methadone  Morphine Sulfate  Oxycodone  Oxycontin  Oxyir  Roxicodone  Tramadol | Indomethacin  Indocin  Indocin SR  Bayer Select  Mobidin  Mobogesic  Meclofenamate sodium  Meclomen  Mefenamic acid  Meloxicam  Mobic  Naproxen  Naprosyn  Naprelan | Aspirin  Bayer  Bufferin  Ecotrin  Excedrin  Celecoxib  Celebrex  Diclofenac potassium  Cataflam  Diclofenac sodium  Salflex  Salsitab  Sodium salicylate  Sulindac  Salsalate | Voltaren  Voltaren XR  Diclofenac sodium  Etodolac  Ansaid  Ibuprofen  Advil  Motrin  Motrin IB  Naproxen sodium  Aleve  Anaprox  Rofecoxib  Valdecoxib  Bextra  Vioxx |
| **Neuropathic Agents** | **Other** | **Benzodiazepines** | |
| Pregabalin  Lyrica  Gabapentin  Neurontin  Amitriptyline  Doxepin  Nortriptyline  Imipramine  Clomipramine  Desipramine  Dosulepin  Iprindole  Lefetramine  Protriptyline  Trimpramine | Lidocaine  Topical capsaicin | Alprazolam  Chlordiazepposide  Clobazam  Clonazepam  Clorazepate  Clotizaepam  Diazepam  Lorazepam  MIdazolam  Oxazepam  Phenazepam  Temazepam  Flumazenil | Eszopiclone  Zalephlon  Zolpidem  Zopiclone |
